# Supplementary material for: Mechanism of Synsepalum dulcificum Daniell. Inhibiting Lung Adenocarcinoma
Source: Evid Based Complement Alternat Med. 2022 Feb 12;2022:5242179. doi: 10.1155/2022/5242179 (PMC8858071; doi:10.1155/2022/5242179)
Supplement: Supplementary Materials — Supplementary schedule 1 mainly stores ADME data related to compounds screened in SD. [file 5242179.f1.xlsx]

## Sheet: Schedule1
nubmer	name	Canonical SMILES	Formula	MW	#Heavy atoms	#Aromatic heavy atoms	Fraction Csp3	#Rotatable bonds	#H-bond acceptors	#H-bond donors	MR	TPSA	iLOGP	XLOGP3	WLOGP	MLOGP	Silicos-IT Log P	Consensus Log P	ESOL Log S	ESOL Solubility (mg/ml)	ESOL Solubility (mol/l)	ESOL Class	Ali Log S	Ali Solubility (mg/ml)	Ali Solubility (mol/l)	Ali Class	Silicos-IT LogSw	Silicos-IT Solubility (mg/ml)	Silicos-IT Solubility (mol/l)	Silicos-IT class	GI absorption	BBB permeant	Pgp substrate	CYP1A2 inhibitor	CYP2C19 inhibitor	CYP2C9 inhibitor	CYP2D6 inhibitor	CYP3A4 inhibitor	log Kp (cm/s)	Lipinski #violations	Ghose #violations	Veber #violations	Egan #violations	Muegge #violations	Bioavailability Score	PAINS #alerts	Brenk #alerts	Leadlikeness #violations	Synthetic Accessibility
1	Quercetin	Oc1cc(O)c2c(c1)oc(c(c2=O)O)c1ccc(c(c1)O)O	C15H10O7	302.24	22	16	0	1	7	5	78.03	131.36	1.63	1.54	1.99	-0.56	1.54	1.23	-3.16	0.211	0.000698	Soluble	-3.91	0.0374	0.000124	Soluble	-3.24	0.173	0.000573	Soluble	High	No	No	Yes	No	No	Yes	Yes	-7.05	0	0	0	0	0	0.55	1	1	0	3.23
2	Oleanolic acid	O[C@H]1CC[C@]2([C@H](C1(C)C)CC[C@@]1([C@@H]2CC=C2[C@@]1(C)CC[C@@]1([C@H]2CC(C)(C)CC1)C(=O)O)C)C	C30H48O3	456.7	33	0	0.9	1	3	2	136.65	57.53	3.94	7.49	7.23	5.82	5.85	6.07	-7.32	2.16e-05	4.74e-08	Poorly soluble	-8.53	1.34e-06	2.94e-09	Poorly soluble	-6.12	0.000345	7.55e-07	Poorly soluble	Low	No	No	No	No	No	No	No	-3.77	1	3	0	1	1	0.85	0	1	2	6.08
3	Kaempferol	Oc1ccc(cc1)c1oc2cc(O)cc(c2c(=O)c1O)O	C15H10O6	286.24	21	16	0	1	6	4	76.01	111.13	1.7	1.9	2.28	-0.03	2.03	1.58	-3.31	0.14	0.00049	Soluble	-3.86	0.0398	0.000139	Soluble	-3.82	0.0429	0.00015	Soluble	High	No	No	Yes	No	No	Yes	Yes	-6.7	0	0	0	0	0	0.55	0	0	0	3.14
4	(+)-Catechin	Oc1cc2O[C@H](c3ccc(c(c3)O)O)[C@H](Cc2c(c1)O)O	C15H14O6	290.27	21	12	0.2	1	6	5	74.33	110.38	1.33	0.36	1.22	0.24	0.98	0.83	-2.22	1.74	0.00598	Soluble	-2.24	1.66	0.00572	Soluble	-2.14	2.09	0.00719	Soluble	High	No	Yes	No	No	No	No	No	-7.82	0	0	0	0	0	0.55	1	1	0	3.5
5	Morin	Oc1ccc(c(c1)O)c1oc2cc(O)cc(c2c(=O)c1O)O	C15H10O7	302.24	22	16	0	1	7	5	78.03	131.36	1.47	1.54	1.99	-0.56	1.54	1.2	-3.16	0.211	0.000698	Soluble	-3.91	0.0374	0.000124	Soluble	-3.24	0.173	0.000573	Soluble	High	No	No	Yes	No	No	Yes	Yes	-7.05	0	0	0	0	0	0.55	0	0	0	3.25
6	Erucamide	CCCCCCCC/C=C\CCCCCCCCCCCC(=O)N	C22H43NO	337.58	24	0	0.86	19	1	1	110.3	43.09	5.02	9.16	7.07	5.06	7.47	6.76	-6.45	0.00012	3.55e-07	Poorly soluble	-9.96	3.69e-08	1.09e-10	Poorly soluble	-7.2	2.13e-05	6.3e-08	Poorly soluble	Low	No	No	Yes	No	No	No	No	-1.86	1	1	1	1	2	0.55	0	1	2	3.44
7	Lanosterol	CC(=CCC[C@H]([C@H]1CC[C@@]2([C@]1(C)CCC1=C2CC[C@@H]2[C@]1(C)CC[C@@H](C2(C)C)O)C)C)C	C30H50O	426.72	31	0	0.87	4	1	1	137.04	20.23	5.17	8.91	8.48	6.82	7.79	7.43	-7.83	6.24e-06	1.46e-08	Poorly soluble	-9.22	2.56e-07	6e-10	Poorly soluble	-7.2	2.71e-05	6.35e-08	Poorly soluble	Low	No	No	No	No	No	No	No	-2.58	1	3	0	1	2	0.55	0	1	2	6.07
8	(+-)-Taxifolin	Oc1cc2O[C@H](c3ccc(c(c3)O)O)[C@H](C(=O)c2c(c1)O)O	C15H12O7	304.25	22	12	0.13	1	7	5	74.76	127.45	0.71	0.95	0.86	-0.64	0.66	0.51	-2.66	0.662	0.00218	Soluble	-3.21	0.186	0.000612	Soluble	-2.03	2.87	0.00942	Soluble	High	No	No	No	No	No	No	No	-7.48	0	0	0	0	0	0.55	1	1	0	3.51
9	Epigallocatechin gallate	Oc1cc(O)c2c(c1)O[C@@H]([C@@H](C2)OC(=O)c1cc(O)c(c(c1)O)O)c1cc(O)c(c(c1)O)O	C22H18O11	458.37	33	18	0.14	4	11	8	112.06	197.37	1.53	1.17	1.91	-0.44	0.57	0.95	-3.56	0.127	0.000276	Soluble	-4.91	0.00564	1.23e-05	Moderately soluble	-2.5	1.46	0.00318	Soluble	Low	No	No	No	No	No	No	No	-8.27	2	0	1	1	3	0.17	1	1	1	4.2
10	Guanosine	OC[C@H]1O[C@H]([C@@H]([C@@H]1O)O)n1cnc2c1nc(N)[nH]c2=O	C10H13N5O5	283.24	20	9	0.5	2	7	5	65.5	159.51	-0.22	-1.89	-3	-2.76	-2.22	-2.02	-0.61	70.1	0.248	Very soluble	-0.94	32.5	0.115	Very soluble	0.51	910	3.21	Soluble	Low	No	No	No	No	No	No	No	-9.37	0	1	1	1	1	0.55	0	0	0	3.86
11	Betaine	[O-]C(=O)C[N+](C)(C)C	C5H11NO2	117.15	8	0	0.8	2	2	0	28.35	40.13	-2.19	-0.13	-1.56	-3.67	-0.91	-1.69	-0.35	52	0.444	Very soluble	-0.26	64.5	0.551	Very soluble	-0.82	17.6	0.15	Soluble	Low	No	No	No	No	No	No	No	-7.11	0	4	0	0	1	0.55	0	1	1	1
